# Supplementary material for: Mechanical anisotropy and tabletability of famotidine polymorphs
Source: Royal Society of Chemistry journal article supplement (doi:10.1039/d1ce01406d), 2022-01-01
Supplement: d1ce01406d1.pdf [file d1ce01406d1.pdf]

S1. Experimental and simulated PXRD patterns for famotidine bulk phases

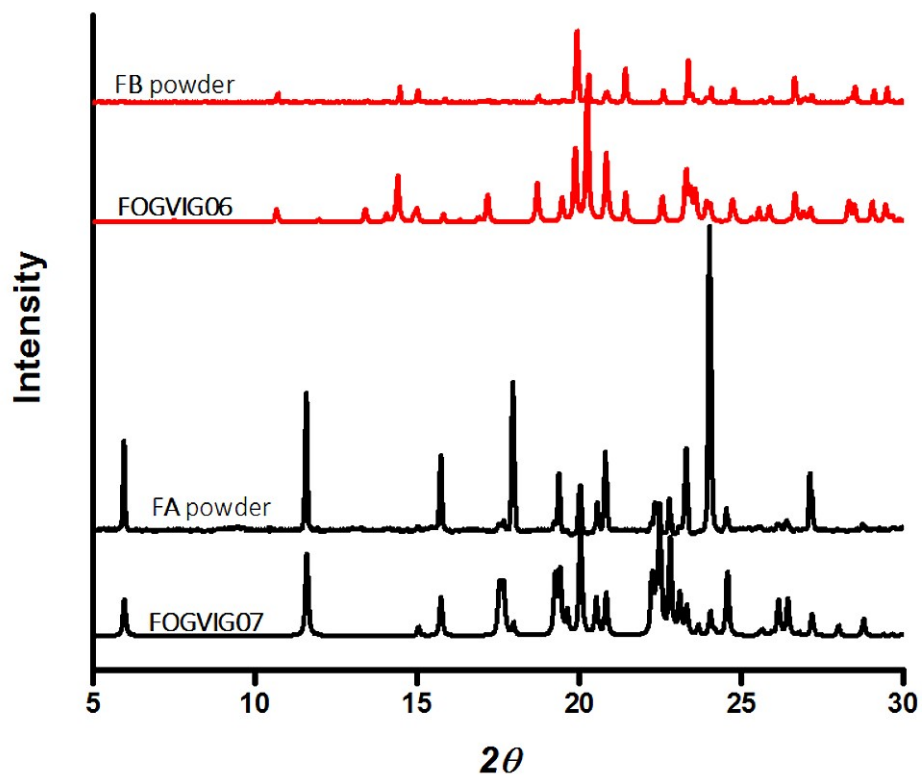

**Figure S1.** PXRD patterns for the bulk powders of FA and FB, compared to reference patterns obtained from FOGVIG06 and FOGVIG07 in the CSD.

**S2. Face identification of single crystals**

Major faces for indentation of both polymorphs were identified on a Bruker D8-QUEST diffractometer, using the APEX3 software. SEM images were also collected for bulk samples to correlate the identified faces with the crystal morphology.

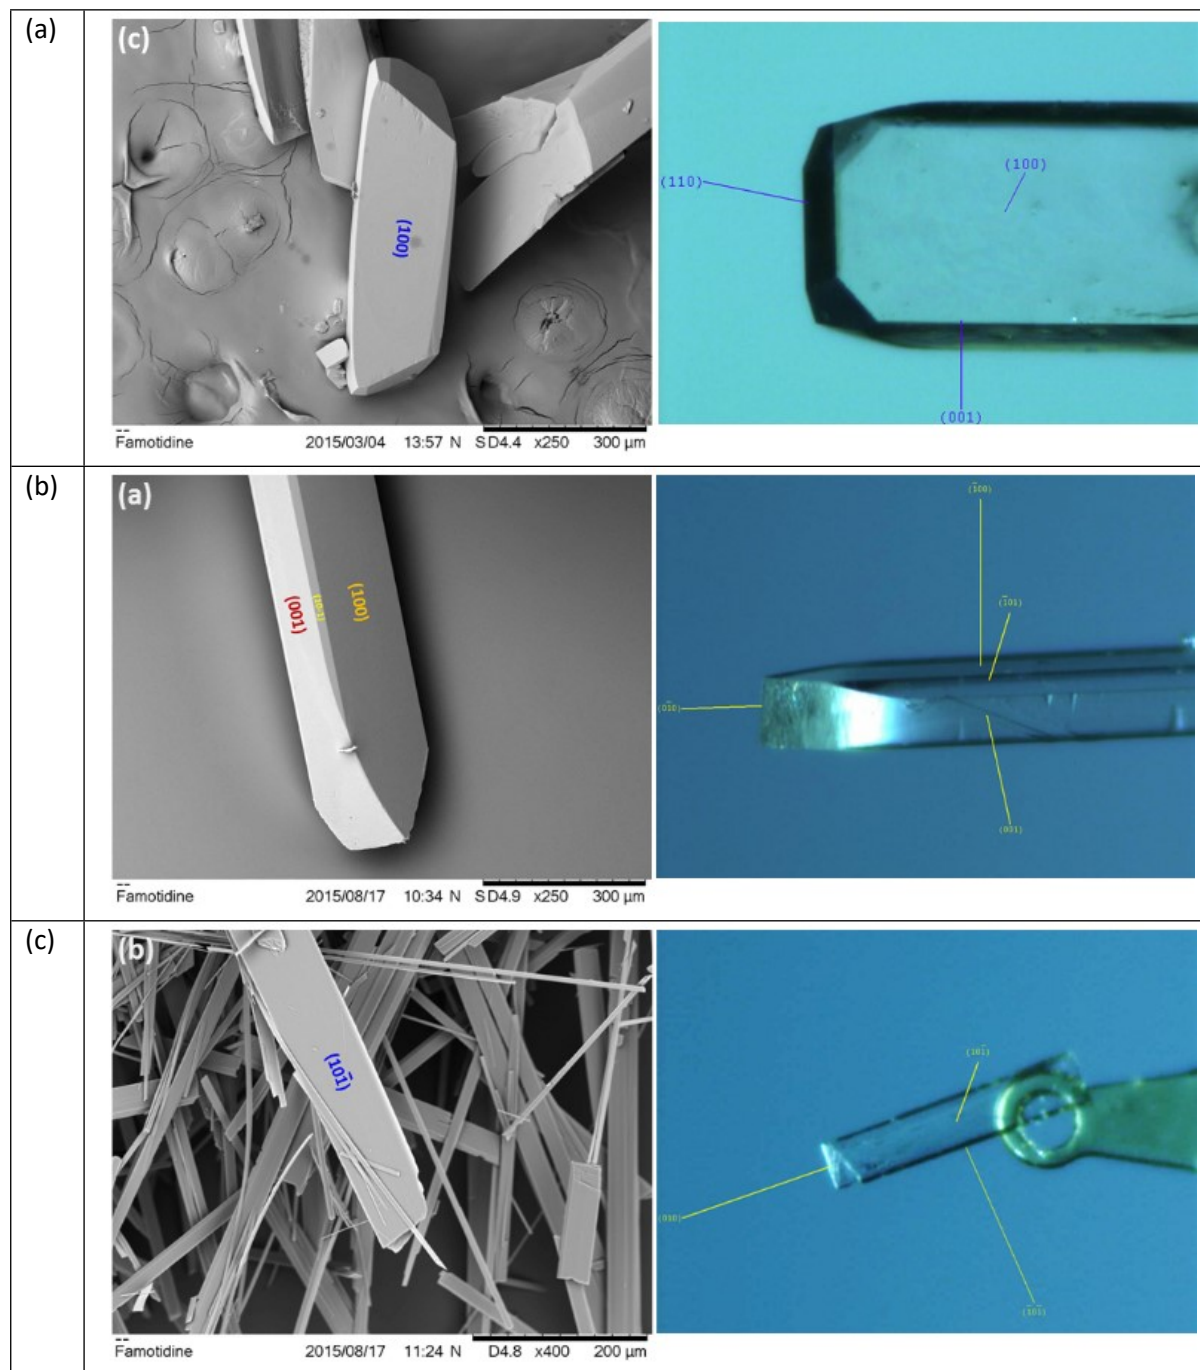

**Figure S2.** SEM images and face-indexed crystals of: (a) form A: {100} and {001} are the major faces; (b) form B, columnar-shaped crystals: {100} is the major face; (c) form B lath-shaped crystals: {10-1} is the major face. Form B indexing refers to the  $P2_1/n$  setting ( $a, b, c \approx 17.0, 5.3, 17.8 \text{ \AA}$ ,  $\beta \approx 117^\circ$ ).

**S3. PIXEL calculations: Form A (CSD: FOGVIG07, space group  $P2_1/c$ )****Unit cell:** a = 11.978, b = 7.196, c = 16.812 Å, alpha = 90, beta = 99.77, gamma = 90°**Symmetry operators:** [1] x, y, z [2] -x, ½+y, ½-z [3] -x, -y, -z [4] x, ½-y, ½+zOnly interactions with magnitude > 3 kJ mol<sup>-1</sup> are listed.

| Mol 1 ARU | Mol 2 ARU | Mol 1 Operator | Mol 2 Operator   | Distance | Coulomb | Polarisation | Dispersion | Repulsion | Total |
|-----------|-----------|----------------|------------------|----------|---------|--------------|------------|-----------|-------|
| 1_555_01  | 3_756_01  | x,y,z          | 2-x,-y,1-z       | 10.621   | -74.4   | -36.0        | -49.7      | 71.6      | -88.6 |
| 1_555_01  | 3_657_01  | x,y,z          | 1-x,-y,2-z       | 12.969   | -134.8  | -66.3        | -37.2      | 151.3     | -86.9 |
| 1_555_01  | 4_554_01  | x,y,z          | x,0.5-y,-0.5+z   | 8.408    | -34.5   | -18.5        | -46.0      | 35.4      | -63.5 |
| 1_555_01  | 4_555_01  | x,y,z          | x,0.5-y,0.5+z    | 8.408    | -34.5   | -18.5        | -46.0      | 35.4      | -63.5 |
| 1_555_01  | 2_646_01  | x,y,z          | 1-x,-0.5+y,1.5-z | 7.219    | -35.9   | -19.8        | -50.0      | 49.8      | -55.8 |
| 1_555_01  | 2_656_01  | x,y,z          | 1-x,0.5+y,1.5-z  | 7.219    | -35.9   | -19.8        | -50.0      | 49.8      | -55.8 |
| 1_555_01  | 1_545_01  | x,y,z          | x,-1+y,z         | 7.196    | -42.1   | -23.6        | -29.9      | 52.6      | -43.0 |
| 1_555_01  | 1_565_01  | x,y,z          | x,1+y,z          | 7.196    | -42.1   | -23.6        | -29.9      | 52.6      | -43.0 |
| 1_555_01  | 3_667_01  | x,y,z          | 1-x,1-y,2-z      | 12.870   | -25.2   | -5.6         | -17.5      | 15.0      | -33.4 |
| 1_555_01  | 2_746_01  | x,y,z          | 2-x,-0.5+y,1.5-z | 7.126    | -7.8    | -6.8         | -30.1      | 20.6      | -24.1 |
| 1_555_01  | 2_756_01  | x,y,z          | 2-x,0.5+y,1.5-z  | 7.126    | -7.8    | -6.8         | -30.1      | 20.6      | -24.1 |
| 1_555_01  | 3_766_01  | x,y,z          | 2-x,1-y,1-z      | 10.501   | -1.1    | -1.3         | -13.8      | 2.3       | -14.0 |
| 1_555_01  | 4_544_01  | x,y,z          | x,-0.5-y,-0.5+z  | 11.181   | 1.0     | -1.5         | -4.2       | 0.4       | -4.3  |
| 1_555_01  | 4_545_01  | x,y,z          | x,-0.5-y,0.5+z   | 11.181   | 1.0     | -1.5         | -4.2       | 0.4       | -4.3  |
| 1_555_01  | 3_656_01  | x,y,z          | 1-x,-y,1-z       | 8.942    | -1.6    | -0.8         | -1.9       | 0.0       | -4.2  |
| 1_555_01  | 4_565_01  | x,y,z          | x,1.5-y,0.5+z    | 10.951   | -2.6    | -0.2         | -0.9       | 0.0       | -3.7  |
| 1_555_01  | 4_564_01  | x,y,z          | x,1.5-y,-0.5+z   | 10.951   | -2.6    | -0.2         | -0.9       | 0.0       | -3.7  |

**S3. PIXEL calculations: Form B (CSD: FOGVIG06, space group  $P2_1/n$ )****Unit cell:** a = 17.048, b = 5.329, c = 17.762Å, alpha = 90, beta = 116.58, gamma = 90°**Symmetry operators:** [1] x, y, z [2]  $\frac{1}{2}-x, \frac{1}{2}+y, \frac{1}{2}-z$  [3] -x, -y, -z [4]  $\frac{1}{2}+x, \frac{1}{2}-y, \frac{1}{2}+z$ Only interactions with magnitude > 3 kJ mol<sup>-1</sup> are listed.

| Mol 1 ARU | Mol 2 ARU | Mol 1 Operator | Mol 2 Operator      | Distance | Coulomb | Polarisation | Dispersion | Repulsion | Total |
|-----------|-----------|----------------|---------------------|----------|---------|--------------|------------|-----------|-------|
| 1_555_01  | 1_565_01  | x,y,z          | x,1+y,z             | 5.329    | -66.0   | -31.4        | -78.9      | 78.2      | -98.1 |
| 1_555_01  | 1_545_01  | x,y,z          | x,-1+y,z            | 5.329    | -66.0   | -31.4        | -78.9      | 78.2      | -98.1 |
| 1_555_01  | 3_666_01  | x,y,z          | 1-x,1-y,1-z         | 9.054    | -72.2   | -19.8        | -38.1      | 38.6      | -91.5 |
| 1_555_01  | 2_545_01  | x,y,z          | 0.5-x,-0.5+y,0.5-z  | 8.996    | -72.6   | -31.4        | -32.6      | 61.7      | -74.9 |
| 1_555_01  | 2_555_01  | x,y,z          | 0.5-x,0.5+y,0.5-z   | 8.996    | -72.6   | -31.4        | -32.6      | 61.7      | -74.9 |
| 1_555_01  | 4_565_01  | x,y,z          | 0.5+x,1.5-y,0.5+z   | 9.154    | -82.1   | -42.6        | -34.7      | 94.8      | -64.5 |
| 1_555_01  | 4_464_01  | x,y,z          | -0.5+x,1.5-y,-0.5+z | 9.154    | -82.1   | -42.6        | -34.7      | 94.8      | -64.5 |
| 1_555_01  | 3_576_01  | x,y,z          | -x,2-y,1-z          | 8.823    | -18.4   | -10.3        | -35.2      | 44.4      | -19.5 |
| 1_555_01  | 2_556_01  | x,y,z          | 0.5-x,0.5+y,1.5-z   | 9.556    | -11.9   | -5.5         | -21.7      | 20.9      | -18.1 |
| 1_555_01  | 2_546_01  | x,y,z          | 0.5-x,-0.5+y,1.5-z  | 9.556    | -11.9   | -5.5         | -21.7      | 20.9      | -18.1 |
| 1_555_01  | 4_575_01  | x,y,z          | 0.5+x,2.5-y,0.5+z   | 10.546   | -6.3    | -1.0         | -5.1       | 1.9       | -10.6 |
| 1_555_01  | 4_474_01  | x,y,z          | -0.5+x,2.5-y,-0.5+z | 10.546   | -6.3    | -1.0         | -5.1       | 1.9       | -10.6 |
| 1_555_01  | 3_566_01  | x,y,z          | -x,1-y,1-z          | 8.878    | -4.7    | -1.6         | -9.3       | 5.3       | -10.3 |
| 1_555_01  | 2_565_01  | x,y,z          | 0.5-x,1.5+y,0.5-z   | 11.736   | -6.3    | -0.4         | -0.6       | 0.0       | -7.2  |
| 1_555_01  | 2_535_01  | x,y,z          | 0.5-x,-1.5+y,0.5-z  | 11.736   | -6.3    | -0.4         | -0.6       | 0.0       | -7.2  |
| 1_555_01  | 1_575_01  | x,y,z          | x,2+y,z             | 10.658   | -3.6    | -0.3         | -0.6       | 0.0       | -4.5  |
| 1_555_01  | 1_535_01  | x,y,z          | x,-2+y,z            | 10.658   | -3.6    | -0.3         | -0.6       | 0.0       | -4.5  |
| 1_555_01  | 3_656_01  | x,y,z          | 1-x,-y,1-z          | 11.821   | 6.1     | -0.9         | -1.7       | 0.0       | 3.6   |
| 1_555_01  | 3_686_01  | x,y,z          | 1-x,3-y,1-z         | 11.698   | 9.9     | -0.5         | -0.4       | 0.0       | 9.1   |
| 1_555_01  | 3_676_01  | x,y,z          | 1-x,2-y,1-z         | 9.001    | 23.1    | -5.0         | -5.3       | 0.2       | 13.0  |

**S4. Energy frameworks from *CrystalExplorer***

Energy frameworks were calculated for FA and FB using *CrystalExplorer* V.1764, based on Gaussian B3LYP-D2/6-31G(d,p) molecular wavefunctions. For each molecule in the asymmetric unit, the total calculated intermolecular interaction energy with another molecule is the sum of electrostatic, polarization, dispersion, and exchange-repulsion components with scaling factors of 1.057, 0.740, 0.871, and 0.618, respectively. The interaction energies of a selected molecule with all molecules having any atom within 3.8 Å were calculated. The interaction energies below 5 kJ mol<sup>-1</sup> were omitted for clarity and the cylinder thickness was taken to be proportional to the intermolecular interaction energies in the energy framework. The resulting energy frameworks are comparable to the energy-vector diagrams calculated using *PIXEL*, and confirm the inherent 3-D (FA) and 2-D (RB) nature of the structures. The corrugated layers in FB parallel to (10 $\bar{1}$ ) show a total intralayer energy of -242 kJ mol<sup>-1</sup> but an interlayer energy of a -40 kJ mol<sup>-1</sup>.

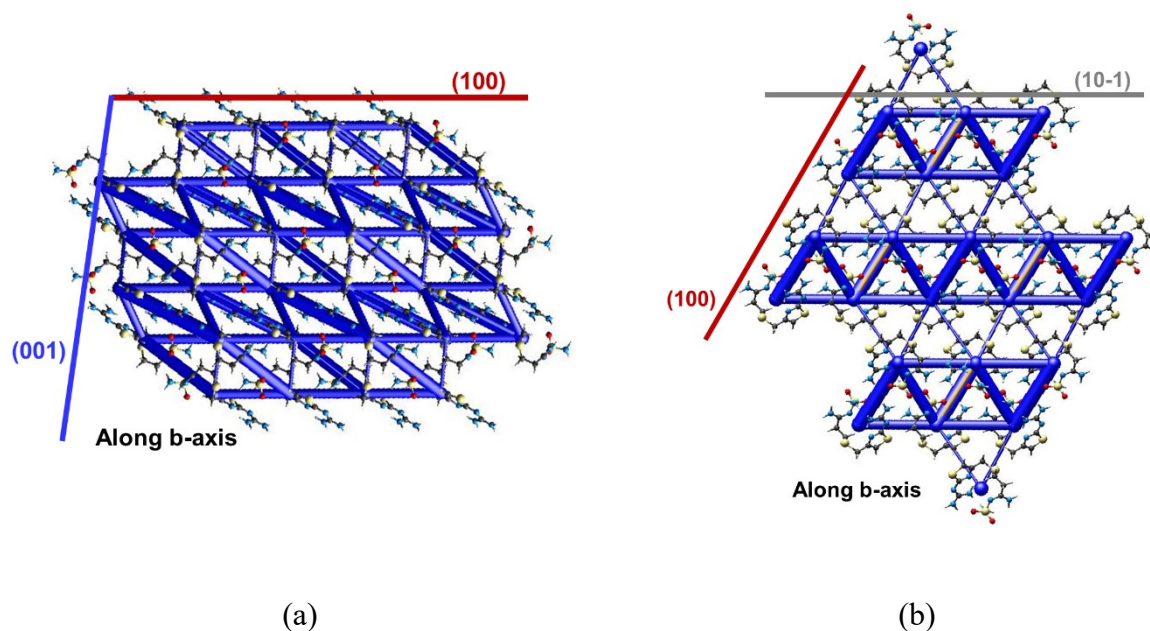

**Figure S3.** *CrystalExplorer* energy frameworks for (a) FA and (b) FB viewed along the *b* axis. The thickness of each blue cylinder represents the relative strength of each pairwise intermolecular interaction. The minimum energy threshold is set at -5 kJ mol<sup>-1</sup>. Red, blue, and gray bars represent the indentation planes (100), (001) and (10 $\bar{1}$ ), respectively.
